# Supplementary material for: Engineering of redox-triggered polymeric lipid hybrid nanocarriers for selective drug delivery to cancer cells
Source: Royal Society of Chemistry journal article supplement (doi:10.1039/d4tb01236d), 2024-12-18
Supplement: d4tb01236d1.pdf [file d4tb01236d1.pdf]

### Supplementary Information

## **Engineering of Redox-triggered Polymeric Lipid Hybrid Nanocarriers for Selective Drug Delivery to Cancer Cells**

B. Siva Lokesh <sup>a,c,#</sup>, Suresh Ajmeera <sup>a,d,e,#</sup>, Rajat Choudhary <sup>a,c</sup>, Sanjaya Kumar Moharana <sup>b,c</sup>,  
C. S. Purohit <sup>b,c</sup>, V Badireenath Konkimalla <sup>a,c,\*</sup>

<sup>a</sup> School of Biological Sciences, National Institute of Science Education and Research, HBNI, Jatni, Odisha 752050, India

<sup>b</sup> School of Chemical Sciences, National Institute of Science Education and Research, HBNI, Jatni, Odisha 752050, India

<sup>c</sup> Homi Bhabha National Institute, Training School Complex, Anushakti Nagar, Mumbai 400094, India

<sup>d</sup> Hasselt University, Institute for Materials Research (IMO), Nano-Biophysics and Soft Matter Interfaces (NSI), Wetenschapspark 1, 3590 Diepenbeek, Belgium

<sup>e</sup> IMEC, associated lab IMOMECE, Wetenschapspark 1, 3590 Diepenbeek, Belgium

\* Corresponding Author

# Equal Contribution

**\* Corresponding author:**

**Dr. V Badireenath Konkimalla**

School of Biological Sciences,

National Institute of Science Education & Research (NISER), PO- Bhipur-Padanpur, Via-Jatni, District: - Khurda, Bhubaneswar, Orissa - 752 050, INDIA

E-mail: [badireenath@niser.ac.in](mailto:badireenath@niser.ac.in) (V.B. Konkimalla)

Tel: +91-674-249 42 11

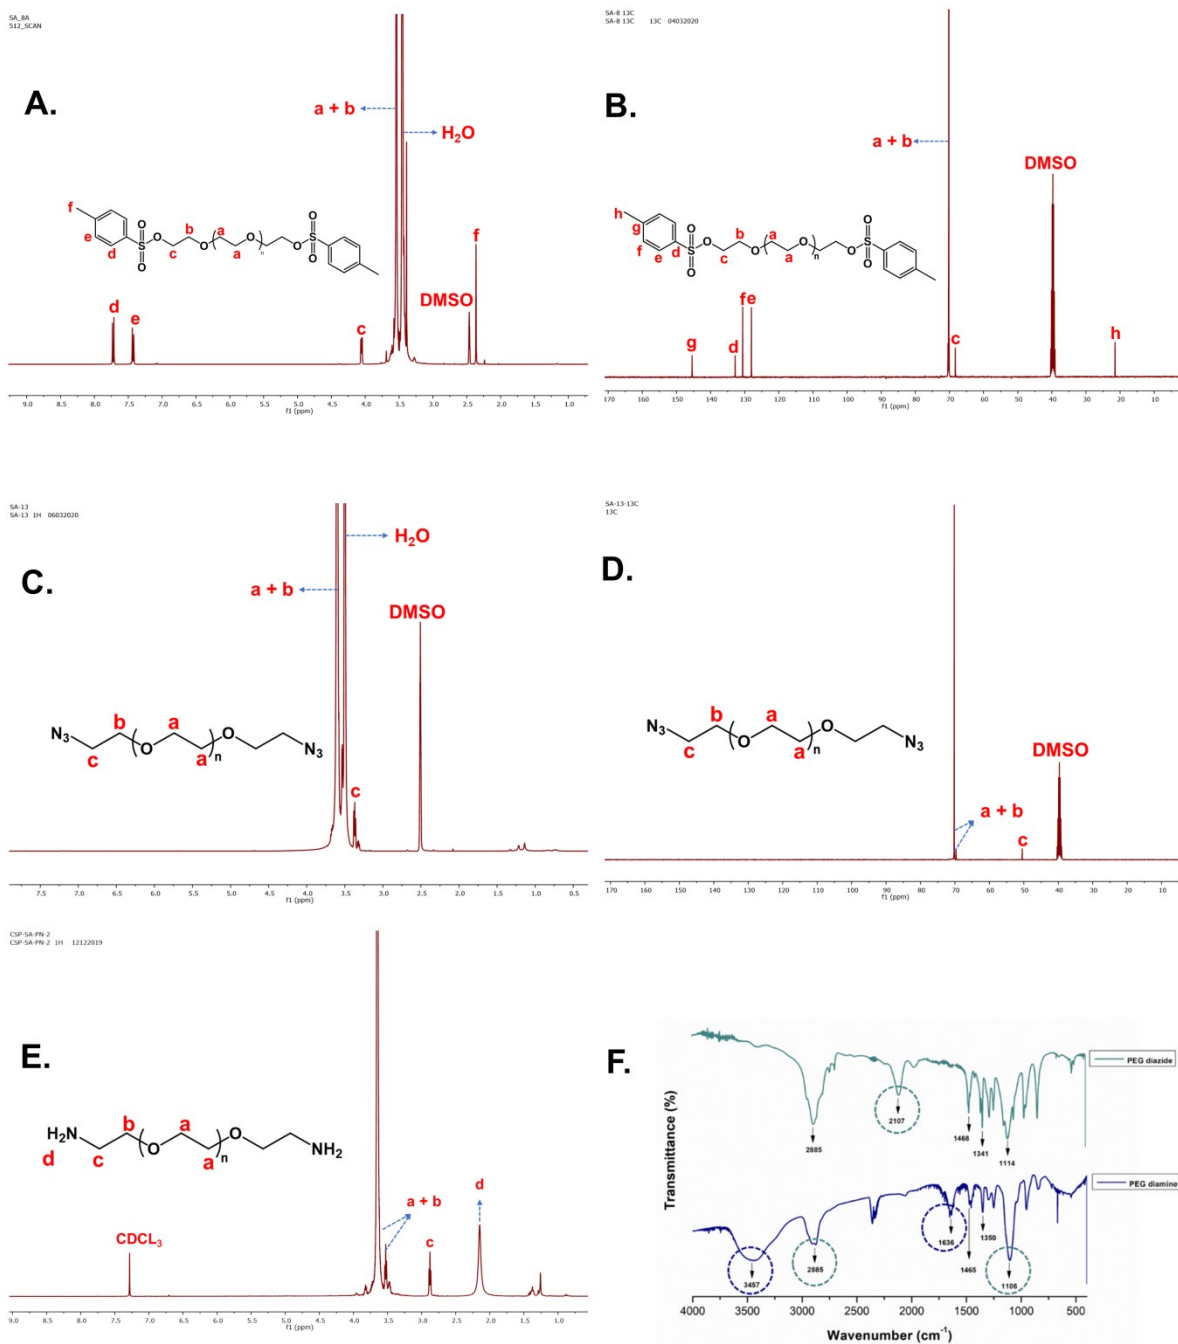

**Fig. S1.** <sup>1</sup>H NMR and <sup>13</sup>C NMR spectrum of tosylated PEG (A and B), PEG diazide (C and D), and <sup>1</sup>H NMR (E), and FTIR spectrum of PEG diamine (F)

**A.**

C33H54O4S2 +H: C33 H55 O4 S2 pa Chrg 1

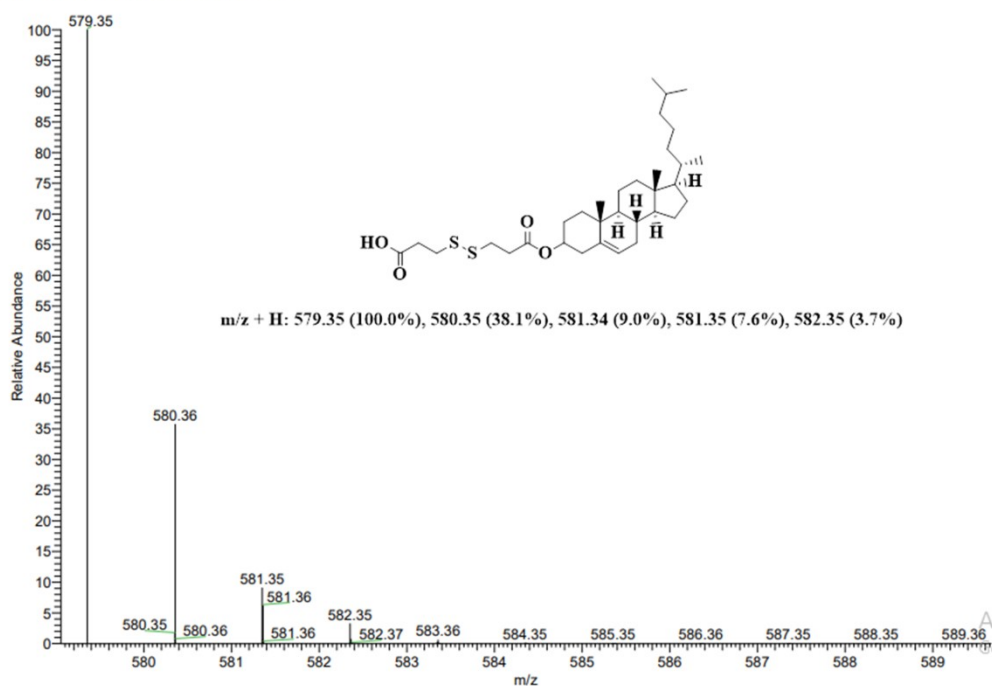

**B.**

T: FTMS + p ESI Full ms [1500.0000-2500.0000]

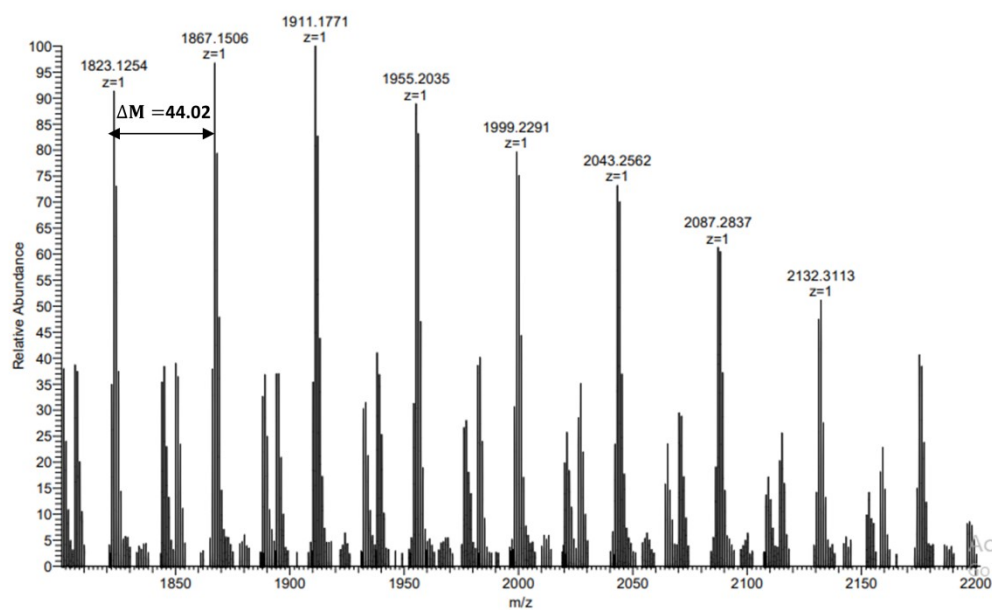

**Fig. S2.** Mass spectrum of Cholesterol-Dithiodipropionate (A) and PEG Diamine (B)

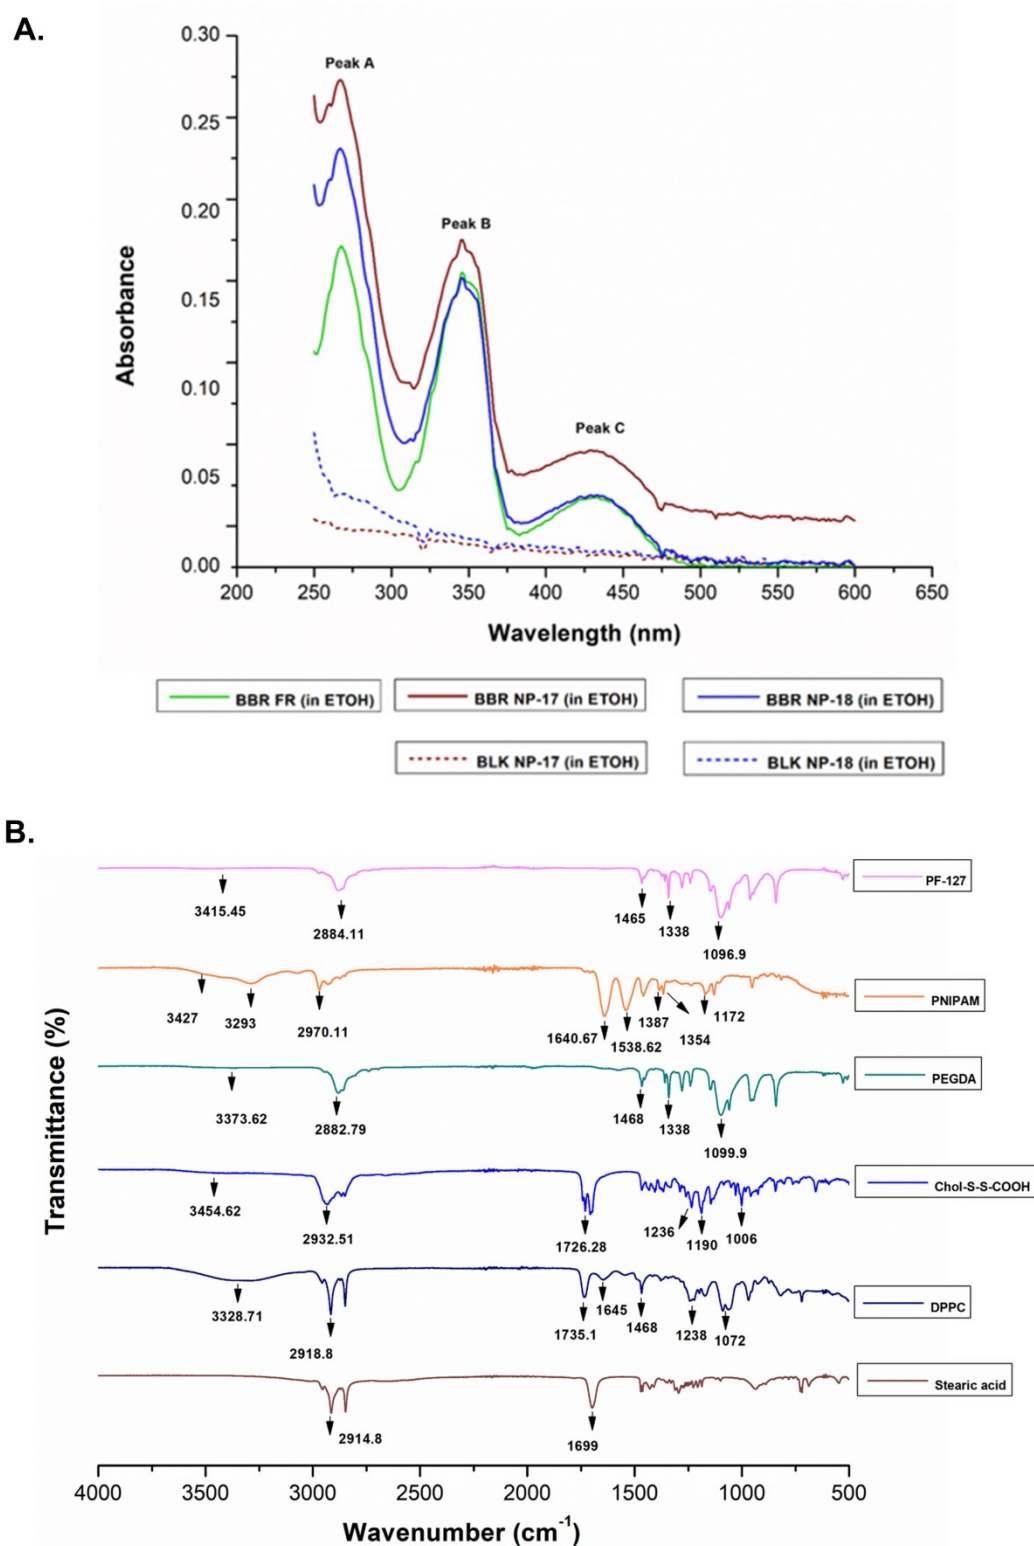

**Fig. S3.** Confirmatory study for the detection of BBR in BBR-loaded RS-PLHNCs by UV-Visible spectroscopy (A). FTIR spectra of free polymers and excipients i.e. PF-127, PNIPAM, PEGDA, disulfide cholesterol, DPPC, and stearic acid (B).

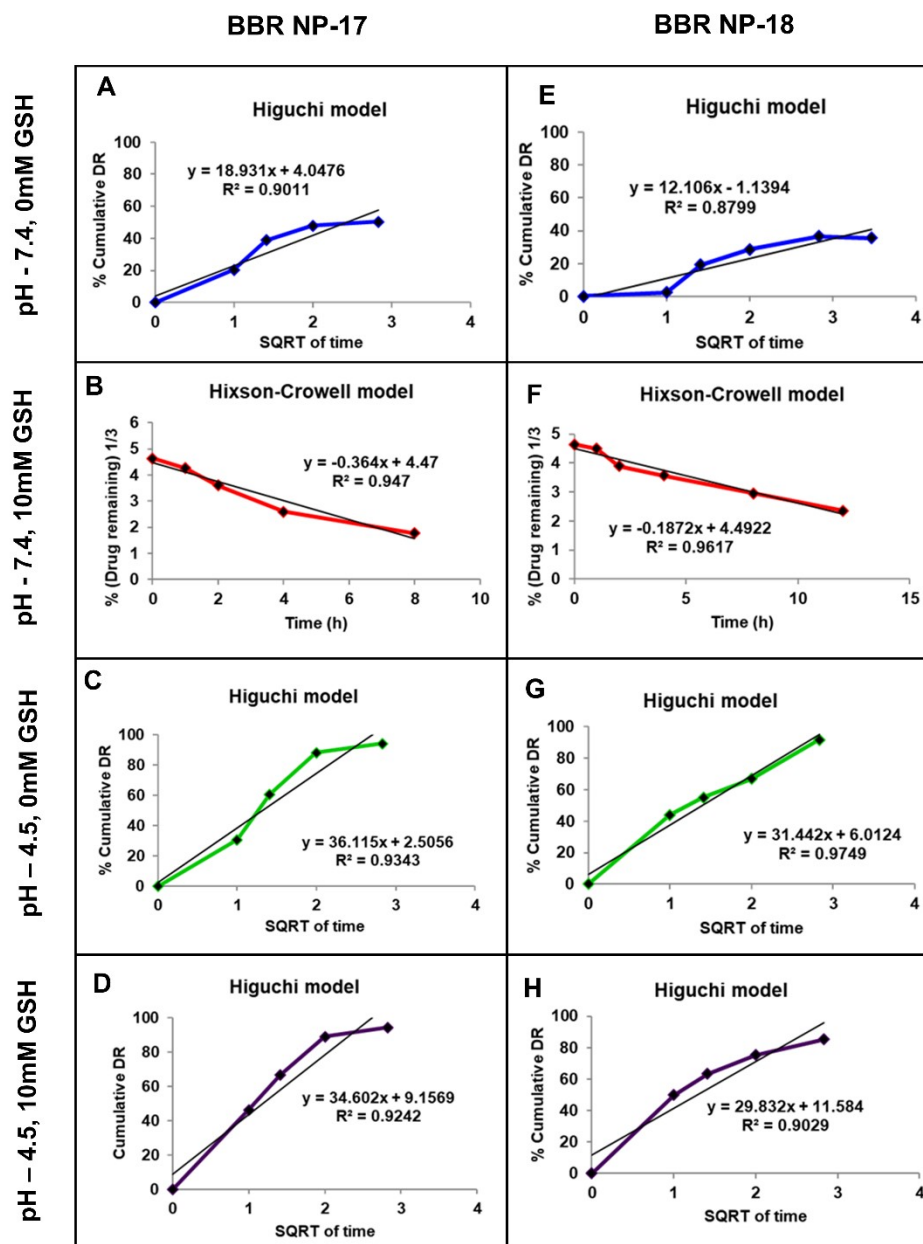

**Fig. S4.** Graphical illustration of the release kinetics of BBR from the nanocarrier system following a particular model (BBR NP-17 (A-D) and BBR NP-18 (E-H))

**Table S1.** Kinetic models of dissolution release profile of Berberine from the RS-PLHNCs (n=3)

(\* denotes the best R<sup>2</sup> value of nanocarriers following a particular model)

| Models                  | BBR NP-17 |                            |        |                            | BBR NP-18 |                            |        |                            |
|-------------------------|-----------|----------------------------|--------|----------------------------|-----------|----------------------------|--------|----------------------------|
|                         | pH 7.4    | pH 7.4<br>+<br>10mM<br>GSH | pH 4.5 | pH 4.5<br>+<br>10mM<br>GSH | pH 7.4    | pH 7.4<br>+<br>10mM<br>GSH | pH 4.5 | pH 4.5<br>+<br>10mM<br>GSH |
| <b>Zero order</b>       | 0.675     | 0.827                      | 0.760  | 0.688                      | 0.750     | 0.868                      | 0.799  | 0.643                      |
| <b>First order</b>      | 0.430     | 0.507                      | 0.453  | 0.393                      | 0.566     | 0.543                      | 0.416  | 0.370                      |
| <b>Higuchi</b>          | 0.901*    | 0.944*                     | 0.934* | 0.924*                     | 0.879*    | 0.953*                     | 0.974* | 0.902*                     |
| <b>Hixson-Crowell</b>   | 0.708     | 0.947*                     | 0.887  | 0.859                      | 0.769     | 0.961*                     | 0.951* | 0.805                      |
| <b>Korsmeyer Peppas</b> | 0.449     | 0.539                      | 0.472  | 0.393                      | 0.759     | 0.672                      | 0.401  | 0.361                      |

### Stability studies (upto 180 days)

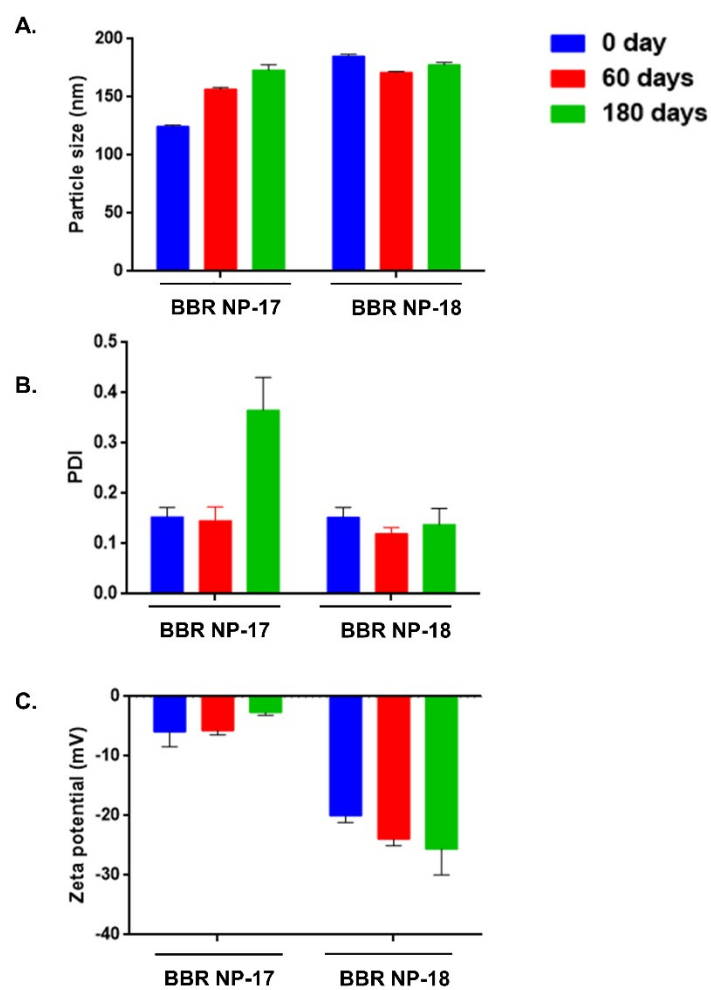

**Fig. S5.** Stability studies of BBR-loaded RS-PLHNCs (BBR NP-17 and 18) for 180 days at 4°C. Representative graph illustrates the changes in particle size (A), PDI (B), and zeta potential (C) occurred during the storage period.

**A.**

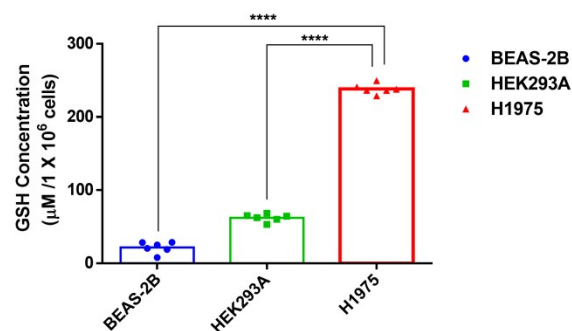

**B.**

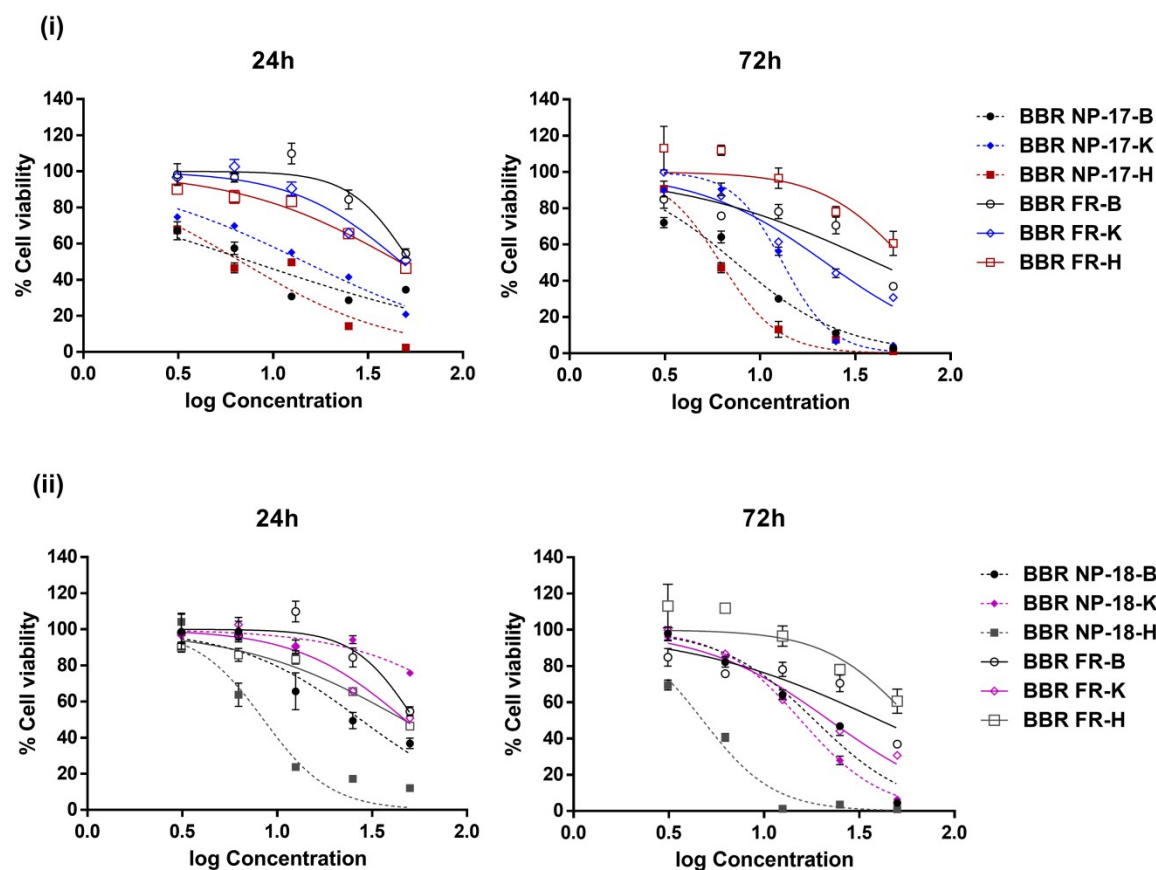

**Fig. S6.** Quantitative analysis of intracellular GSH levels in BEAS-2B, HEK293A, and H1975 cells (A). All the values are expressed in mean  $\pm$  SEM (n=6). A one way ANOVA multiple comparison test was used to compare the intracellular GSH level difference between normal cells (BEAS-2B & HEK293A cells), and cancer cells (H1975 cells).

Half maximal inhibitory graphs after the incubation of BBR NP-17 (B (i)) and BBR NP-18 (B (ii)) for 24 and 72 h in BEAS-2B, HEK293A and H1975 cells.

**Abbreviations:**

**H: H1975** (lung cancer cell line). **BBR NP-17-H:** H1975 cells treated with BBR NP-17 nanocarriers, **BBR NP-18-H:** H1975 cells treated with BBR NP-18 nanocarriers, **BBR FR-H:** refers to H1975 cells treated with free form of BBR.

**B: BEAS-2B** (normal lung epithelial cells). **BBR NP-17-B:** BEAS-2B cells treated with BBR NP-17 nanocarriers, **BBR NP-18-B:** BEAS-2B cells treated with BBR NP-18 nanocarriers. **BBR FR-B:** refers to BEAS-2B cells treated with free form of BBR.

**K: HEK293A** (normal human embryonic kidney cells). **BBR NP-17-K:** HEK293A cells treated with BBR NP-17 nanocarriers, **BBR NP-18-K:** HEK293A cells treated with BBR NP-18 nanocarriers. **BBR FR-K:** refers to HEK293A cells treated with free form of BBR.

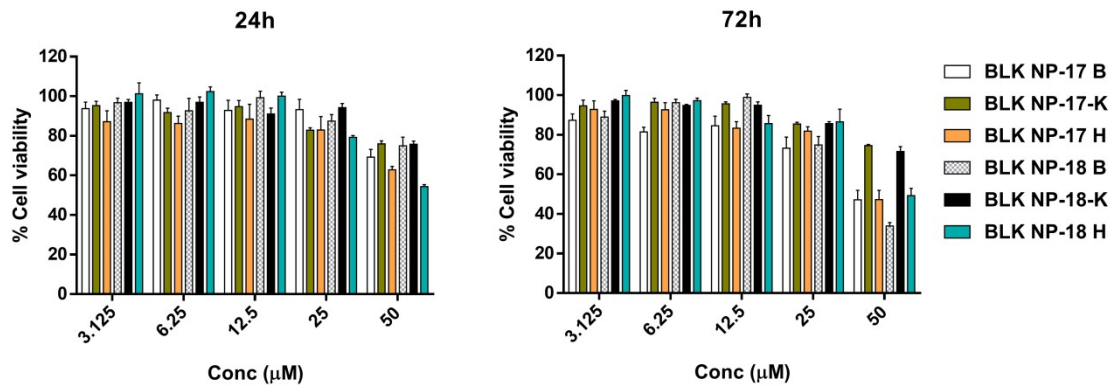

**Fig. S7.** Biocompatibility studies of BLK NP-17 and 18 in BEAS-2B, HEK293A, and H1975 cells. (data represented as mean  $\pm$  SEM, n=5). Difference in p values \*p<0.05, \*\*p< 0.01, \*\*\*p<0.001, and \*\*\*\*p<0.0001 was considered to be statistically significant and ns-non significant.

**Abbreviations:** **B-** BEAS-2B cells. **BLK NP-17-B-** BEAS-2B cells treated with BLK NP-17 nanocarriers, **BLK NP-18-B-** BEAS-2B cells treated with BLK NP-18 nanocarriers.

**K-** HEK293A cells. **BLK NP-17-K-** HEK293A cells treated with BLK NP-17 nanocarriers, **BLK NP-18-K-** HEK293A cells treated with BLK NP-18 nanocarriers.

**H -** H1975 cancer cells. **BLK NP-17-H-** H1975 cells treated with BLK NP-17 nanocarriers, **BLK NP-18-H-** H1975 cells treated with BLK NP-18 nanocarriers.

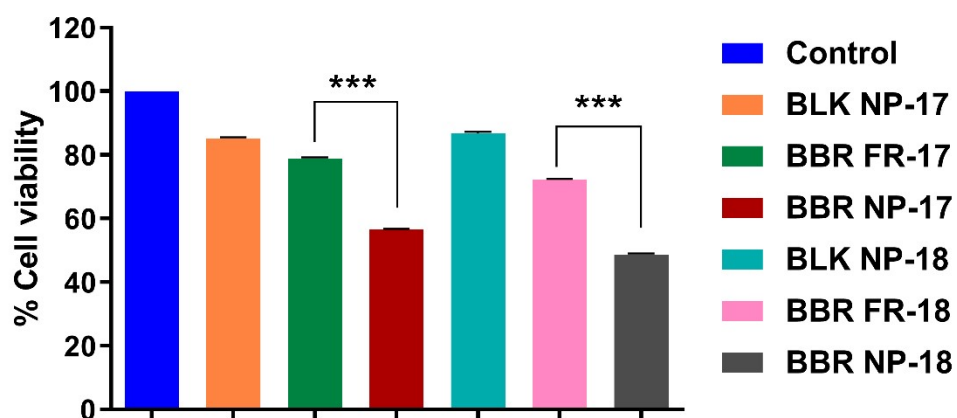

**Fig. S8.** Determination of cell viability (%) by cell counting method after the incubation of H1975 cancer cells with BLK NP-17 and 18, free BBR, BBR NP-17 and 18 for 24h. A one-way ANOVA test was used to evaluate the difference in cell viability between the groups treated with free BBR and BBR-loaded RS-PLHNCs. Statistical significance: \* $p < 0.05$ , \*\* $p < 0.01$ , \*\*\* $p < 0.001$  and ns- non significant.

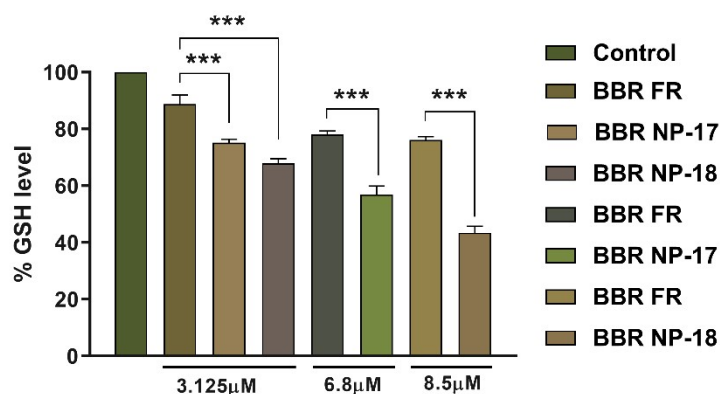

**Fig. S9.** Quantitative analysis of intracellular GSH levels in H1975 cancer cells after treatment with different concentrations of free BBR, BBR NP-17 and 18. All the values are expressed in mean  $\pm$  SEM (n=6). A one-way ANOVA test was employed to assess the differences in the decreased levels of intracellular GSH after treatment with free BBR and nanoparticulate form of BBR. Difference in p values \*p<0.05, \*\*p< 0.01, \*\*\*p<0.001, and \*\*\*\*p<0.0001 was considered to be statistically significant and ns-non significant

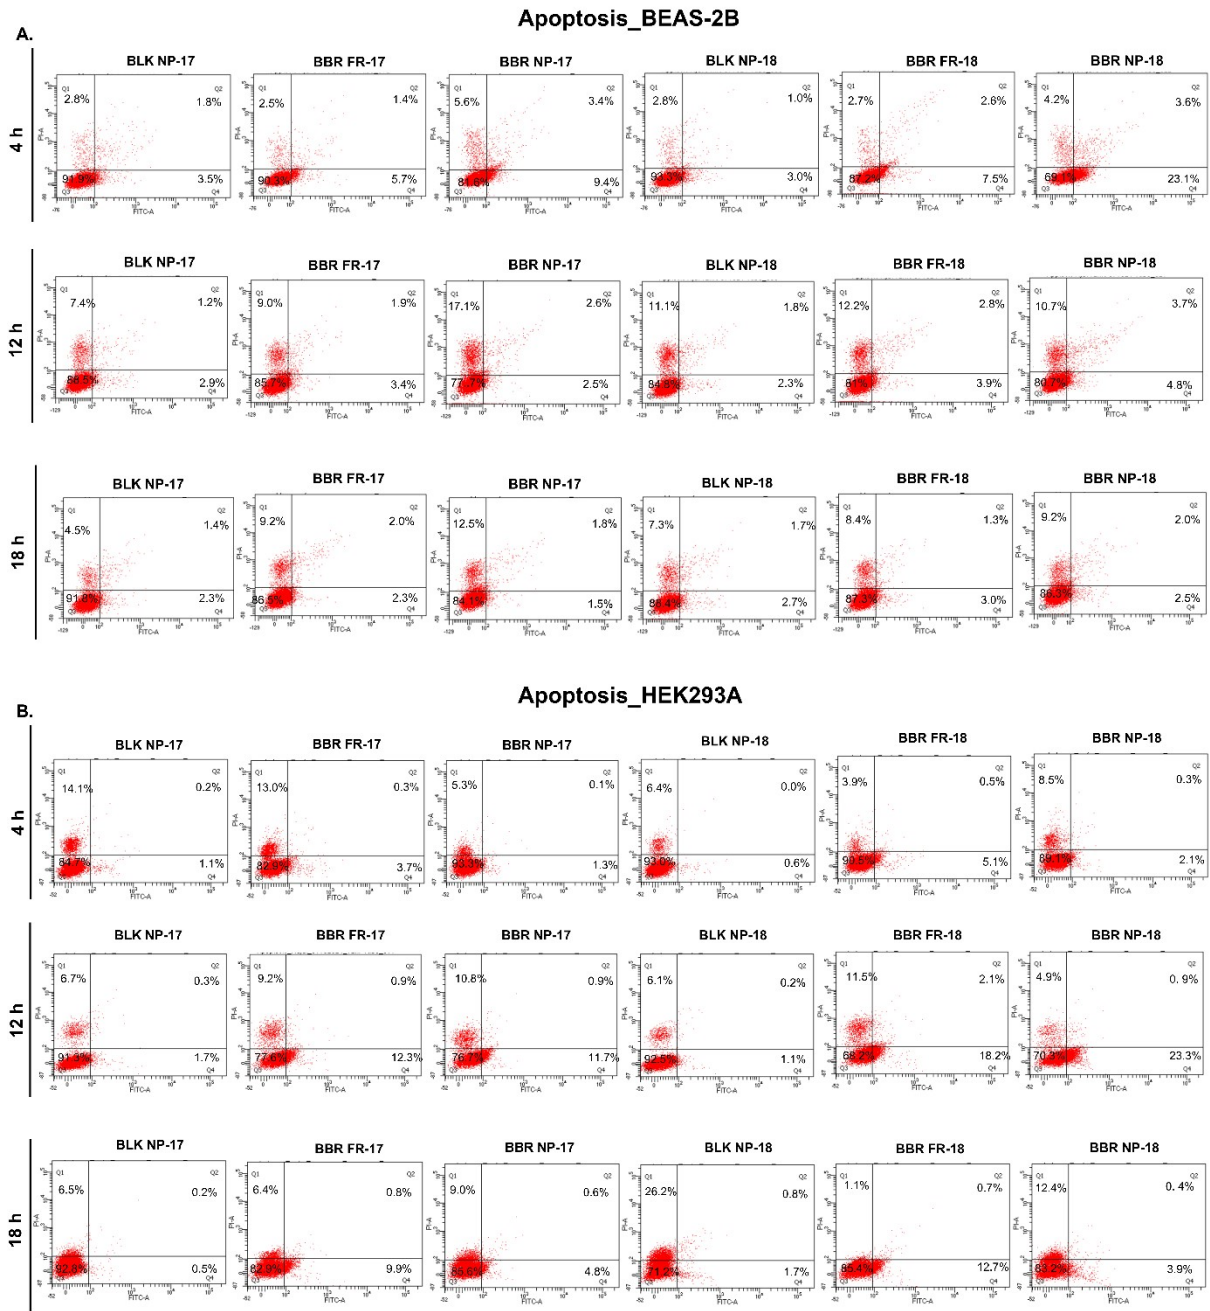

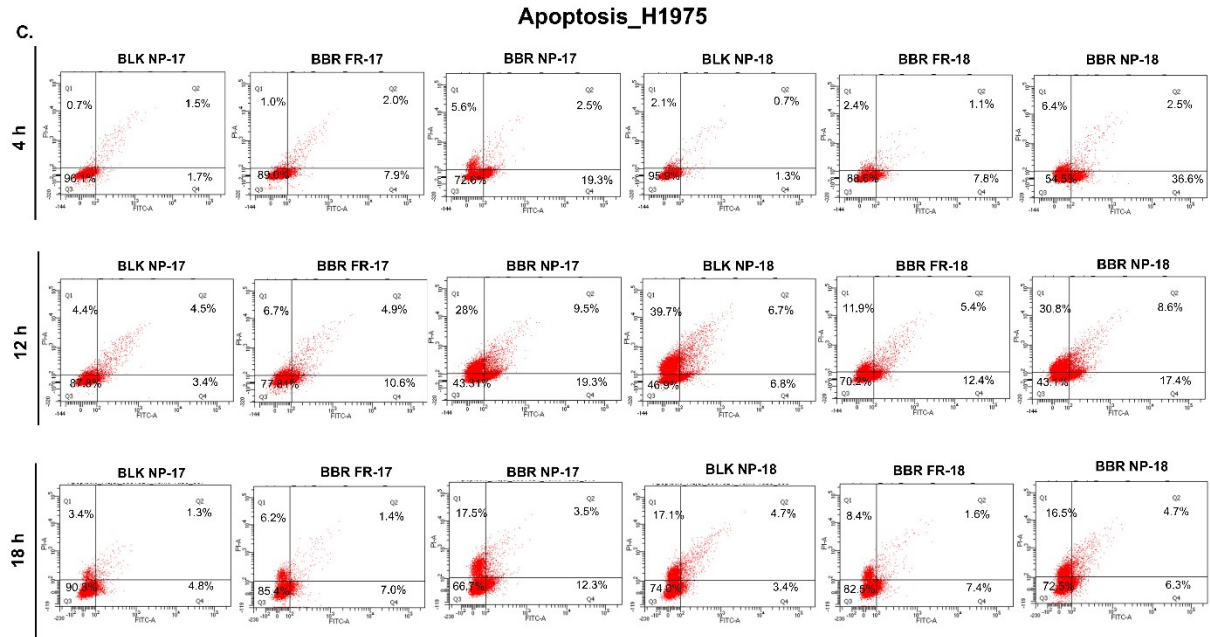

**Fig. S10.** Representative dot plots of % cell apoptosis from flow cytometry analysis. Q1 (Annexin V-FITC-/PI+) indicates necrosis, Q3 (Annexin V-FITC-/PI-) normal live cell population whereas, Q2 (Annexin V-FITC+/PI+) and Q4 (Annexin V-FITC+/PI-) represents late and early apoptosis respectively.

**Table S2** Sequences of the primers used for real-time PCR (FP: Forward Primer RP: Reverse Primer)

| Sl. No. | Gene   | Primer sequence (5'- 3') |                       | Tm (°C) | Amplicon size (bp) |
|---------|--------|--------------------------|-----------------------|---------|--------------------|
| 1.      | NOXA   | FP                       | GTGCCAGCAGACCTGAAGG   | 60.67   | 151                |
|         |        | RP                       | CCTGGGAGGTCCCTTCTTG   | 59.01   |                    |
| 2       | PUMA   | FP                       | GAGCAGCACCTGGAGTCG    | 60.13   | 180                |
|         |        | RP                       | CTGCTCCTCTTGTCTCCGC   | 60.15   |                    |
| 3.      | MCL-1  | FP                       | AGATGGCGTAACAACTGGGG  | 60.61   | 188                |
|         |        | RP                       | ACTCCACAAACCCATCCCAGC | 62.63   |                    |
| 4.      | NQO1   | FP                       | AGAAACGACATCACAGGGGAG | 59.72   | 174                |
|         |        | RP                       | GGGCACCCCAAACCAATACA  | 60.54   |                    |
| 5.      | TXRND1 | FP                       | TCGACCCTTCTTGCTTTGGAT | 59.65   | 103                |
|         |        | RP                       | AAGGAGGATGAAAACACCGGC | 60.89   |                    |
| 6.      | HMOX1  | FP                       | GAGCTGCACCGAAGGGCT    | 62.40   | 169                |
|         |        | RP                       | GGTAGCGGGTATATGCGTGG  | 60.39   |                    |
| 7.      | NFE2L2 | FP                       | TCAGCTACTCCCAGGTTGC   | 59.02   | 135                |
|         |        | RP                       | GGGCAAGCGACTGAAATGTA  | 58.55   |                    |
| 8.      | GAPDH  | FP                       | ACCATCTTCCAGGAGCGAGA  | 60.32   | 147                |
|         |        | RP                       | GGCGGAGATGATGACCCTT   | 59.17   |                    |
